# Supplementary material for: Transcriptomic Analysis of the Host Response to Mild and Severe CTV Strains in Naturally Infected Citrus sinensis Orchards
Source: MDPI journal article supplement (doi:10.3390/ijms23052435), 2022-02-23
Supplement: s1 [file s1]

**Supplementary material**  
**Ramírez-Pool et al., 2022**

**Supplementary tables**

**Table S1.** Sample collecting sites of sweet orange trees showing CTV symptoms in Veracruz, Mexico.

| Sample    | Latitude (°N) | Longitude (°W) | Symptoms     |
|-----------|---------------|----------------|--------------|
| Sample 1  | 20.66846      | -97.37957      | Mild         |
| Sample 2  | 20.66846      | -97.37926      | Mild         |
| Sample 3  | 20.66861      | -97.37892      | Asymptomatic |
| Sample 4  | 20.67187      | -97.38067      | Mild         |
| Sample 5  | 20.67201      | -97.3797       | Mild         |
| Sample 6  | 20.67158      | -97.38015      | Asymptomatic |
| Sample 7  | 20.71471      | -97.38503      | Severe       |
| Sample 8  | 20.71465      | -97.38509      | Severe       |
| Sample 9  | 20.71504      | -97.38496      | Asymptomatic |
| Sample 10 | 20.7391       | -97.38067      | Severe       |
| Sample 11 | 20.71392      | -97.38067      | Severe       |
| Sample 12 | 20.70333      | -97.21888      | Asymptomatic |
| Sample 13 | 20.70336      | -97.21905      | Mild         |
| Sample 14 | 20.69525      | -97.29107      | Asymptomatic |
| Sample 15 | 20.69546      | -97.2908       | Asymptomatic |
| Sample 16 | 20.66859      | -97.37899      | Asymptomatic |
| Sample 17 | 20.71505      | -97.38492      | Asymptomatic |
| Sample 18 | 20.71382      | -97.38017      | Asymptomatic |
| Sample 19 | 20.66468      | -97.38785      | Severe       |
| Sample 20 | 20.66958      | -97.38049      | Mild         |
| Sample 21 | 20.65780      | -97.38913      | Mild         |

**Table S2.** Summary of sequence reads and unigenes.

A) Raw data read and high-quality read numbers, after using Quality Control Python Script.

| Condition         | Raw data reads |              |            | High quality reads |              |            |
|-------------------|----------------|--------------|------------|--------------------|--------------|------------|
|                   | Forward (R1)   | Reverse (R2) | Total      | Forward (R1)       | Reverse (R2) | Total      |
| Asymptomatic      | 11,554,453     | 11,554,453   | 23,108,906 | 11,284,456         | 11,284,456   | 22,568,912 |
| Severe CTV strain | 10,497,308     | 10,497,308   | 20,994,616 | 10,275,130         | 10,275,130   | 20,550,260 |
| Mild CTV strain   | 10,352,061     | 10,352,061   | 20,704,122 | 10,131,387         | 10,131,387   | 20,262,774 |
|                   |                |              | 64,807,644 |                    |              | 63,381,946 |

B) Longer reads obtained by merging paired-end reads with overlapping regions and unmerged paired-end reads using SeqPrep.

| Condition         | Merged paired-end reads | Unmerged paired-end reads |              |
|-------------------|-------------------------|---------------------------|--------------|
|                   |                         | Forward (R1)              | Reverse (R2) |
| Asymptomatic      | 8,464,587               | 2,690,443                 | 2,690,443    |
| Severe CTV strain | 7,827,596               | 2,301,768                 | 2,301,768    |
| Mild CTV strain   | 7,660,822               | 2,339,494                 | 2,339,494    |
|                   | 23,953,005              | 14,663,410                |              |

C) Clean unigenes obtained with different bioinformatic programs.

| Project                                                 | Trinity | DeconSeq | AlignWise | BlastClust |
|---------------------------------------------------------|---------|----------|-----------|------------|
| Transcriptome assembly<br><i>C. sinensis</i> (Veracruz) | 124,794 | 124,215  | 91,548    | 83,672     |

**Table S3.** Genes related to signaling and disease resistance in response to CTV infection.

| Arabidopsis<br>gene ID | <i>C. sinensis</i><br>gene ID | Description <sup>1</sup>                                                                                                           | log <sub>2</sub> fold change |                         |
|------------------------|-------------------------------|------------------------------------------------------------------------------------------------------------------------------------|------------------------------|-------------------------|
|                        |                               |                                                                                                                                    | Mild<br>infectio<br>n        | Severe<br>infectio<br>n |
| AT3G14470              | XP_006466045.1                | NB-ARC domain-containing disease resistance protein.                                                                               | 7.1293                       | 8.3966                  |
| AT3G47570              | XP_006470403.1                | Leucine-rich repeat protein kinase family protein.                                                                                 | 7.5774                       | 0                       |
| AT4G39090              | XP_006473584.1                | Rd19 cysteine proteinases, induced by desiccation. Required for RRS1-R mediated resistance against <i>Ralstonia solanacearum</i> . | 4.2743                       | 0                       |
| AT5G17680              | XP_024953872.1                | Disease resistance protein (TIR-NBS-LRR class).                                                                                    | 5.4683                       | 0                       |
| AT1G06840              | XP_006464962.1                | Probable LRR receptor-like serine/threonine-protein kinase.                                                                        | 9.7993                       | 0                       |
| AT1G53430              | XP_024957540.1                | Probable LRR receptor-like serine/threonine-protein kinase.                                                                        | 8.3219                       | 0                       |
| AT4G28300              | XP_015383147.2                | A prion-like protein regulator of seed germination undergoes hydration-dependent phase separation.                                 | -8.2574                      | 0                       |
| AT4G27190              | XP_006475172.1                | Disease resistance protein RPS2-like isoform X2.                                                                                   | 7.3219                       | 0                       |
| AT4G33720              | XP_006486820.1                | Pathogenesis-related protein 1-like.                                                                                               | 5.8784                       | 0                       |
| AT3G04720              | XP_006487793.1                | Pathogenesis-related protein PR-4A.                                                                                                | 4.9185                       | 0                       |
| AT1G20030              | XP_006493553.1                | Thaumatococcus-like protein 1b.                                                                                                    | 5.1851                       | -7.5925                 |
| AT1G17860              | XP_006465039.1                | Kunitz trypsin inhibitor 2-like.                                                                                                   | 8.7616                       | 0                       |
| AT3G54420              | NP_001275834.1                | Chitinase CHI1 precursor.                                                                                                          | 12.1969                      | -7.3038                 |
| AT3G12500              | NP_001306999.1                | Endochitinase-like precursor.                                                                                                      | 7.0524                       | 0                       |
| AT1G02800              | NP_001275794.1                | Acidic cellulase.                                                                                                                  | 8.4263                       | 0                       |
| AT4G39400              | XP_006464515.1                | Plasma membrane localized leucine-rich repeat receptor kinase involved in brassinosteroid signal transduction.                     | 0                            | -8.2668                 |
| AT4G16990              | XP_006479988.1                | Disease resistance protein (TIR-NBS class).                                                                                        | -6.7460                      | -8.3309                 |
| AT5G18350              | XP_006478367.1                | Protein suppressor of npr1-1, constitutive 1-like.                                                                                 | 0                            | 6.4094                  |
| AT2G31880              | XP_006478632.1                | Leucine-rich repeat receptor-like                                                                                                  | 0                            | 8.3923                  |

|           |                |                                                                |   |         |
|-----------|----------------|----------------------------------------------------------------|---|---------|
|           |                | serine/threonine/tyrosine-protein.<br>kinase SOBIR1.           |   |         |
| AT3G47110 | XP_024955845.1 | Putative receptor-like protein kinase.                         | 0 | 8.6294  |
| AT4G11170 | XP_024949622.1 | Putative disease resistance protein.                           | 0 | -7.6724 |
| AT4G08850 | XP_024953388.1 | Probable leucine-rich repeat receptor-<br>like protein kinase. | 0 | 7.8202  |

---

<sup>1</sup> Source: <https://www.arabidopsis.org/>  
<https://www.ncbi.nlm.nih.gov/>

**Table S4.** Genes related to DNA replication, repair and translation in response to CTV infection.

| Arabidopsis ID                                         | C. sinensis ID | Description <sup>1</sup>                                     | log <sub>2</sub> fold change |
|--------------------------------------------------------|----------------|--------------------------------------------------------------|------------------------------|
| <b>Downregulated genes in mild CTV-infected plants</b> |                |                                                              |                              |
| <i>DNA replication/genome integrity/DNA repair</i>     |                |                                                              |                              |
| AT2G24490                                              | XP_006483593.1 | Replication protein A 32 kDa subunit A                       | -7.3399                      |
| AT5G13820                                              | XP_006486468.1 | Telomere repeat-binding protein 4 isoform X2                 | -9.5962                      |
| AT1G00990                                              | XP_006490999.1 | FEN1 flap endonuclease                                       | -7.3038                      |
| AT3G28030                                              | XP_006470382.1 | DNA repair protein UVH3 isoform X4                           | -8.2192                      |
| AT5G11580                                              | XP_006476033.1 | Ultraviolet-B receptor UVR8 isoform X1                       | -6.8948                      |
| AT5G64420                                              | XP_015388269.1 | Myb-binding protein 1A                                       | -8.2854                      |
| AT2G22720                                              | XP_006466376.1 | Protein SPT2                                                 | -8.5236                      |
| AT2G27170                                              | XP_006487808.1 | Structural maintenance of chromosomes protein 3              | -7.5774                      |
| <i>Translation</i>                                     |                |                                                              |                              |
| AT1G17080                                              | XP_006477943.1 | 60S ribosomal protein L18a-like protein isoform X1           | -7.6221                      |
| AT1G76810                                              | XP_006473041.1 | Eukaryotic translation initiation factor 5B                  | -9.7830                      |
| AT2G04520                                              | XP_006469570.1 | Eukaryotic translation initiation factor 1A                  | -9.4429                      |
| AT2G31610                                              | XP_006466354.1 | 40S ribosomal protein S3-3                                   | -7.8642                      |
| AT3G01740                                              | XP_024951194.1 | 54S ribosomal protein L37, mitochondria                      | -7.4594                      |
| AT3G25520                                              | XP_006492784.1 | 60S ribosomal protein L5                                     | -7.7549                      |
| AT3G44590                                              | XP_006471376.1 | 60S acidic ribosomal protein P2A-like                        | -7.6935                      |
| AT3G55280                                              | XP_006486050.1 | 60S ribosomal protein L23a                                   | -8.1849                      |
| AT3G60240                                              | XP_006464388.1 | Eukaryotic translation initiation factor 4G-like             | -7.7279                      |
| AT4G11420                                              | XP_006472155.1 | Eukaryotic translation initiation factor 3 subunit A         | -8.6257                      |
| AT4G33740                                              | XP_024952836.1 | Ribosomal RNA processing protein 1 homolog                   | -8.1241                      |
| AT5G38640                                              | XP_006494252.1 | Translation initiation factor eIF-2B subunit delta isoform X | -7.4998                      |
| <b>Upregulated genes in mild CTV-infected plants</b>   |                |                                                              |                              |
| <i>DNA replication/genome integrity/DNA repair</i>     |                |                                                              |                              |
| AT4G11670                                              | XP_006477423.1 | Protein unc-13 homolog isoform X1                            | 7.5622                       |
| AT5G22330                                              | XP_006482057.1 | RuvB-like protein 1                                          | 7.8455                       |
| AT1G20720.1                                            | XP_006473806.1 | RAD3-like DNA-binding helicase protein                       | 8.2900                       |

|                                                          |                |                                                    |         |
|----------------------------------------------------------|----------------|----------------------------------------------------|---------|
| <i>Translation</i>                                       |                |                                                    |         |
| AT5G19510                                                | XP_006470501.1 | Elongation factor 1-beta 2                         | 4.9619  |
| AT2G21580                                                | XP_006487218.1 | 40S ribosomal protein S25-2                        | 7.3750  |
| <b>Downregulated genes in severe CTV-infected plants</b> |                |                                                    |         |
| <i>DNA replication/genome integrity/DNA repair</i>       |                |                                                    |         |
| AT2G24490                                                | XP_006483593.1 | Replication protein A 32 kDa subunit A             | -7.3399 |
| AT5G63920                                                | XP_006465105.1 | DNA topoisomerase 3-alpha isoform X1               | -7.4346 |
| AT5G55310                                                | XP_024953709.1 | DNA topoisomerase 1 beta-like isoform X1           | -8.2046 |
| AT1G17980                                                | XP_006493030.1 | Nuclear poly(A) polymerase 1 isoform X1            | -7.4263 |
| AT4G05420                                                | XP_015382568.1 | DNA damage-binding protein 1a isoform X2           | -7.2095 |
| AT5G64420                                                | XP_015388269.1 | Myb-binding protein 1A                             | -8.2854 |
| AT5G11310                                                | XP_024953685.1 | Ultraviolet-B receptor UVR8 isoform X2             | -7.5999 |
| AT5G15860                                                | XP_024949988.1 | Sister chromatid cohesion 1 protein 4 isoform X2   | -7.2854 |
| <i>Translation</i>                                       |                |                                                    |         |
| AT2G44065                                                | XP_024951250.1 | Ribosomal protein L2 family                        | -7.9248 |
| AT5G24510                                                | XP_006491363.1 | 60S acidic ribosomal protein P1-like               | -7.1799 |
| AT2G39390                                                | XP_006486009.1 | 60S ribosomal protein L35                          | -7.0768 |
| AT2G27710                                                | XP_006471376.1 | 60S acidic ribosomal protein P2A-like              | -7.6935 |
| AT3G55280                                                | XP_006486050.1 | 60S ribosomal protein L23a                         | -8.1849 |
| AT5G39740                                                | XP_006492784.1 | 60S ribosomal protein L5                           | -6.7549 |
| AT1G17080                                                | XP_006477943.1 | 60S ribosomal protein L18a-like protein isoform X1 | -7.6221 |
| AT3G59540                                                | XP_006480494.1 | 60S ribosomal protein L38                          | -7.3038 |
| AT1G07940                                                | XP_006485903.1 | Elongation factor 1-alpha                          | -4.4175 |
| AT5G60390                                                | XP_015388818.1 | Elongation factor 1-alpha                          | -9.4878 |
| AT1G76810                                                | XP_006473041.1 | Eukaryotic translation initiation factor 5B        | -9.7830 |
| AT3G60240                                                | XP_006464388.1 | Eukaryotic translation initiation factor 4G-like   | -7.7279 |
| AT2G04520                                                | XP_006469570.1 | Eukaryotic translation initiation factor 1A        | -9.4429 |
| AT5G24510                                                | XP_006491363.1 | 60S acidic ribosomal protein P1-like               | -7.1799 |
| AT1G26910                                                | XP_006486128.1 | 60S ribosomal protein L10                          | -7.7616 |
| <b>Upregulated genes in severe CTV-infected plants</b>   |                |                                                    |         |
| <i>DNA replication/genome integrity/DNA repair</i>       |                |                                                    |         |
| AT5G13820                                                | XP_006486468.1 | Telomere repeat-binding protein 4 isoform X2       | 7.4179  |
| AT5G59910                                                | XP_006488268.1 | Histone H2B.3                                      | 7.1085  |
| <i>Translation</i>                                       |                |                                                    |         |
| AT2G21580                                                | XP_006487218.1 | 40S ribosomal protein S25-2                        | 7.1997  |
| AT3G59670                                                | XP_006466516.1 | Elongation factor LOC102619044                     | 7.3663  |

<sup>1</sup> Source: <https://www.arabidopsis.org/>  
<https://www.ncbi.nlm.nih.gov/>

**Table S5.** Genes involved in PTGS, epigenetic regulation and RNA processing in response to CTV infection.

| Arabidopsis ID | <i>C. sinensis</i> ID | Description <sup>1</sup>                                                                          | log <sub>2</sub> fold change |                  |
|----------------|-----------------------|---------------------------------------------------------------------------------------------------|------------------------------|------------------|
|                |                       |                                                                                                   | Mild infection               | Severe infection |
| AT3G27860      | XP_006470311.1        | Tudor/PWWP/MBT superfamily protein.                                                               | 7.9542                       | 0                |
| AT1G48410      | XP_006478120.1        | Protein argonaute 1 isoform X2.                                                                   | -4.5397                      | -9.4939          |
| AT2G13370      | XP_006470733.1        | Protein argonaute 4-like.                                                                         | -7.4263                      | 7.9307           |
| AT5G52230      | XP_006490367.1        | Methyl-CpG-binding domain-containing protein 13 isoform X1.                                       | -7.000                       | -8.5850          |
| AT5G14170      | XP_006470053.1        | SWI/SNF complex component SNF12 homolog.                                                          | -8.1749                      | 0                |
| AT2G28600      | XP_006492170.1        | DEAD-box ATP-dependent RNA helicase 5 isoform X1.                                                 | 7.7279                       | 0                |
| AT1G27900      | XP_006484063.1        | Probable pre-mRNA-splicing factor ATP-dependent RNA helicase DEAH4 isoform X1.                    | -8.1599                      | 0                |
| AT3G22330      | XP_015386756.1        | DEAD-box ATP-dependent RNA helicase 53, mitochondrial-like.                                       | -8.1293                      | 0                |
| ---            | XP_024953685.1        | Regulator of chromosome condensation (RCC1) family protein.                                       | 0                            | -7.5999          |
| ---            | XP_024948665.1        | Histone-lysine N-methyltransferase SUV5 isoform X2.                                               | 0                            | -7.2761          |
| AT4G16310      | XP_015384332.1        | Lysine-specific histone demethylase 1 homolog 3 isoform X3.                                       | 0                            | -7.1699          |
| AT3G26850      | XP_015385461.1        | Histone-lysine N-methyltransferase; zinc finger CCH domain-containing protein 55-like isoform X3. | 0                            | 7.2384           |
| AT1G20670      | XP_024958045.1        | DNA-binding bromodomain-containing protein.                                                       | 0                            | -7.9887          |
| AT2G27040      | XP_006470434.1        | Protein argonaute 4-like.                                                                         | -7.4263                      | 7.9307           |
| AT5G23570      | XP_024952165.1        | Protein suppressor of gene silencing 3.                                                           | 0                            | 8.3354           |

<sup>1</sup> Source: <https://www.arabidopsis.org/>  
<https://www.ncbi.nlm.nih.gov/>

**Table S6.** Primers used to validate the RNA-Seq experiment by RT-qPCR.

| Primer ID            | Sequence 5' → 3'     |
|----------------------|----------------------|
| XP_006475507.1_FW    | GCATGTGATGTTGCTCGAAG |
| XP_006475507.1_RV    | GCAAGCTTGGCAAGGTAATC |
| XP_006470053.1_FW    | TCCCTTGATGGAGGTTCTTG |
| XP_006470053.1_RV    | GGTGCTGCAATTTTCTAGCC |
| XP_024949213.1_FW    | CGTGGTCGAACTGATTGTTG |
| XP_024949213.1_RV    | ACACTTTCATCTCCCCAAG  |
| XP_006490176.1_FW    | TGTGGAAGATGGACCAAACC |
| XP_006490176.1_RV    | AGCAACCTCCCCGTTTTTAC |
| XP_024953872.1_FW    | CGTATGATTGGGATCTGTGG |
| XP_024953872.1_RV    | GATCAGACCGCCTTTTCTG  |
| XP_006470311.1_FW    | ATGTTGGTGCAGAGCATGAG |
| XP_006470311.1_RV    | GAGCGGATTCCAGAAATGAC |
| XP_006483041.1_FW    | CGCTGAGTGCAATTATGTGG |
| XP_006483041.1_RV    | ACGATATTCGGGAGAGCAAC |
| XP_006485913.1_FW    | ATACGGAAACGTGGGAACAG |
| XP_006485913.1_RV    | TTTCTCTTGGGCTTGTCTG  |
| XP_006468074.1_FW    | ATTTCTGCAGAGGGAGATGC |
| XP_006468074.1_RV    | AGGTCTCCCATTTGGTTGTG |
| XP_006471773.1_FW    | ATACCCCTTGCCACATCAAG |
| XP_006471773.1_RV    | TGTTACCCGTCCTCCAAATC |
| XP_024949989.1_FW    | GGCTTCTGTTGATGTGCAAG |
| XP_024949989.1_RV    | TACTGGCAGTTGCATTGTCC |
| XP_006479423.1_FW    | TGGAAATCTCAGCGGAAGAC |
| XP_006479423.1_RV    | ATATCACGAGCTGGGGTTTG |
| CsACT-F <sup>1</sup> | ACTTCGTCTTGACCTTGCTG |
| CsACT-F <sup>1</sup> | TCAAGAGCGATGTAAGCCAG |

<sup>1</sup> Mafra et al., 2012

Supplementary figures

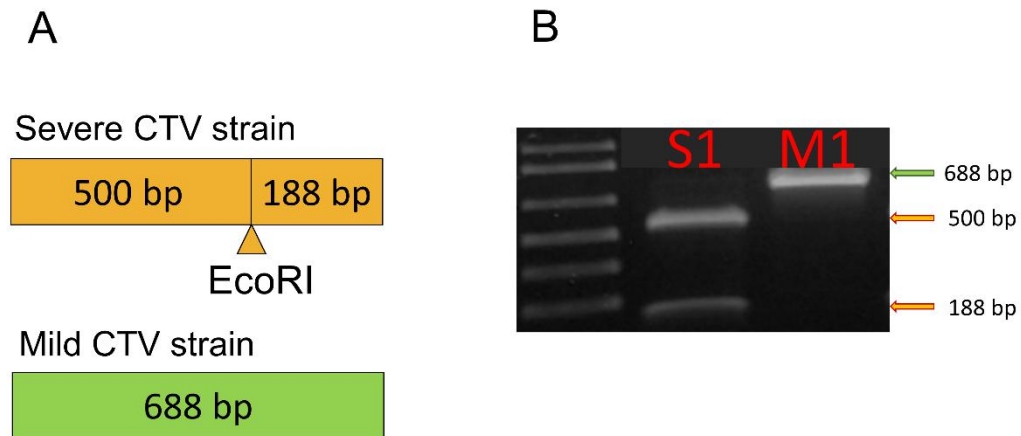

**Figure S1.** Identification of severe or mild CTV strain by digestion with EcoRI restriction enzyme. A) Schematic representation of the single nucleotide polymorphism (SNP) in coat protein (CP) gene of 688 bp of a severe CTV strain with an EcoRI restriction site at 500 bp (upper panel), and a mild CTV strain with no restriction site (lower panel). B) Agarose gel electrophoresis of the RT-PCR from CP gene of a severe CTV strain (S1) and a mild CTV strain (M1). 1Kb Plus DNA ladder marker (Invitrogen) was used.

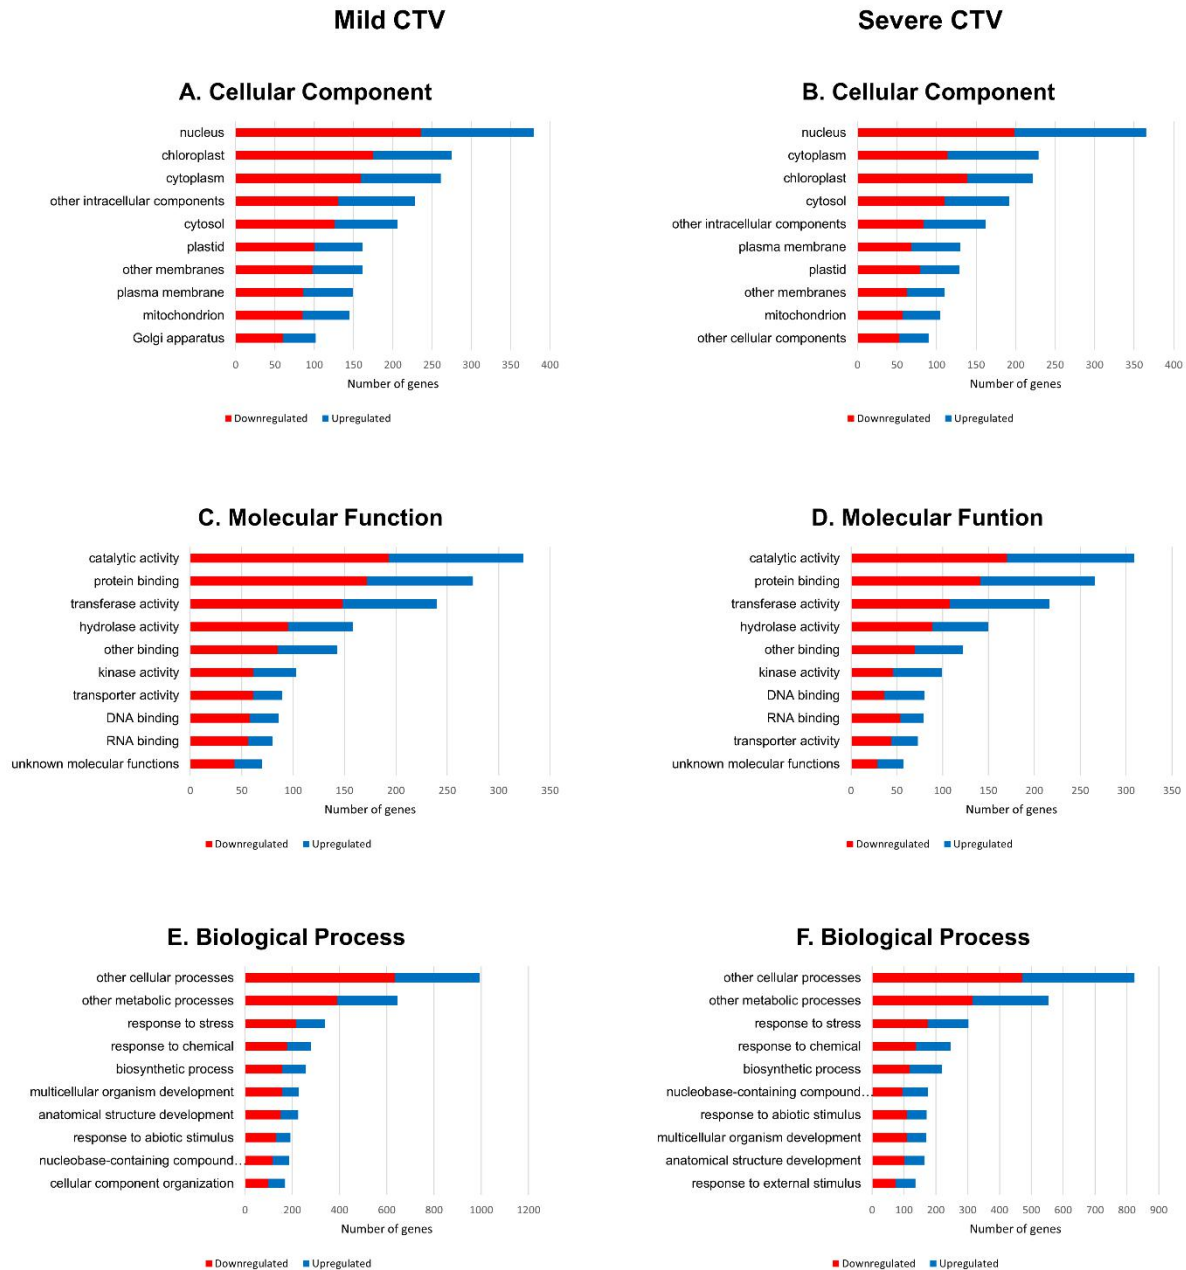

**Figure S2.** Classification of differentially expressed transcripts in GO terms of biological functions in plants infected with mild (left) and severe (right) CTV strains. (A) Cellular component; (B) Molecular function; and (C) Biological process. Red bars represent downregulated genes, blue bars represent upregulated genes. Number of genes (hits) are shown on the x-axis.

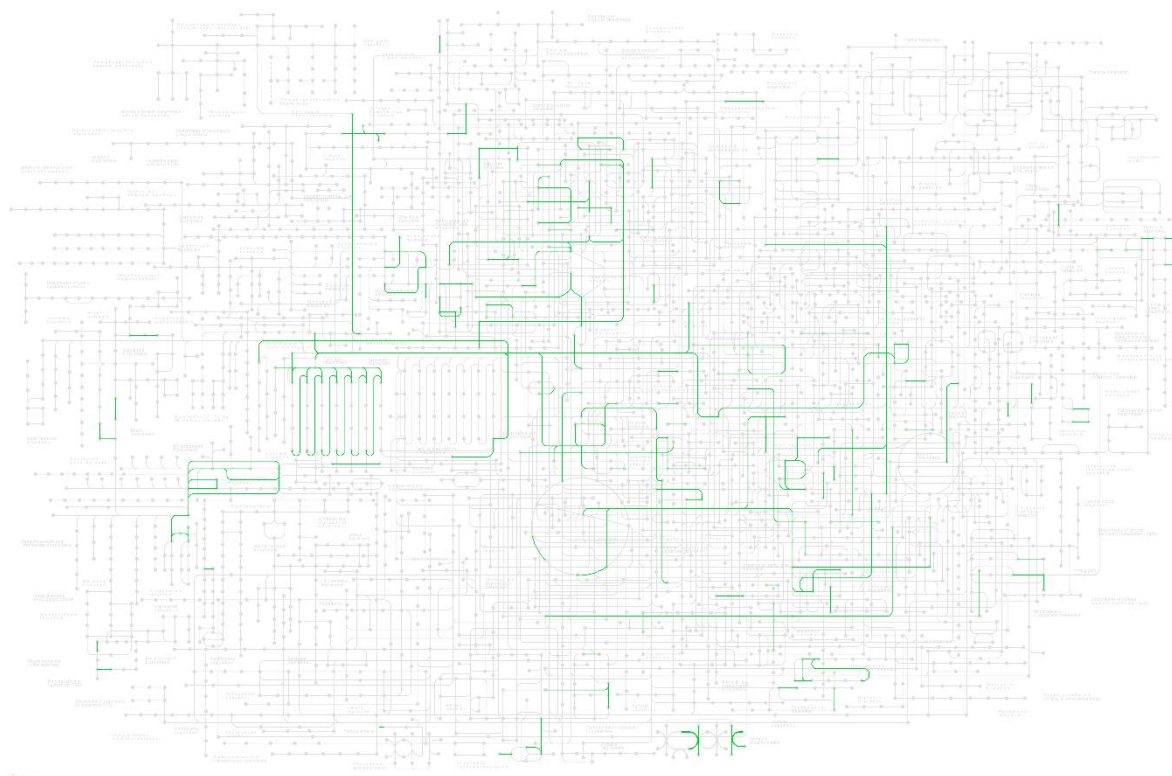

**Figure S3.** Metabolic pathways affected in mildly CTV-infected plants. Green lines indicate differentially regulated pathways.

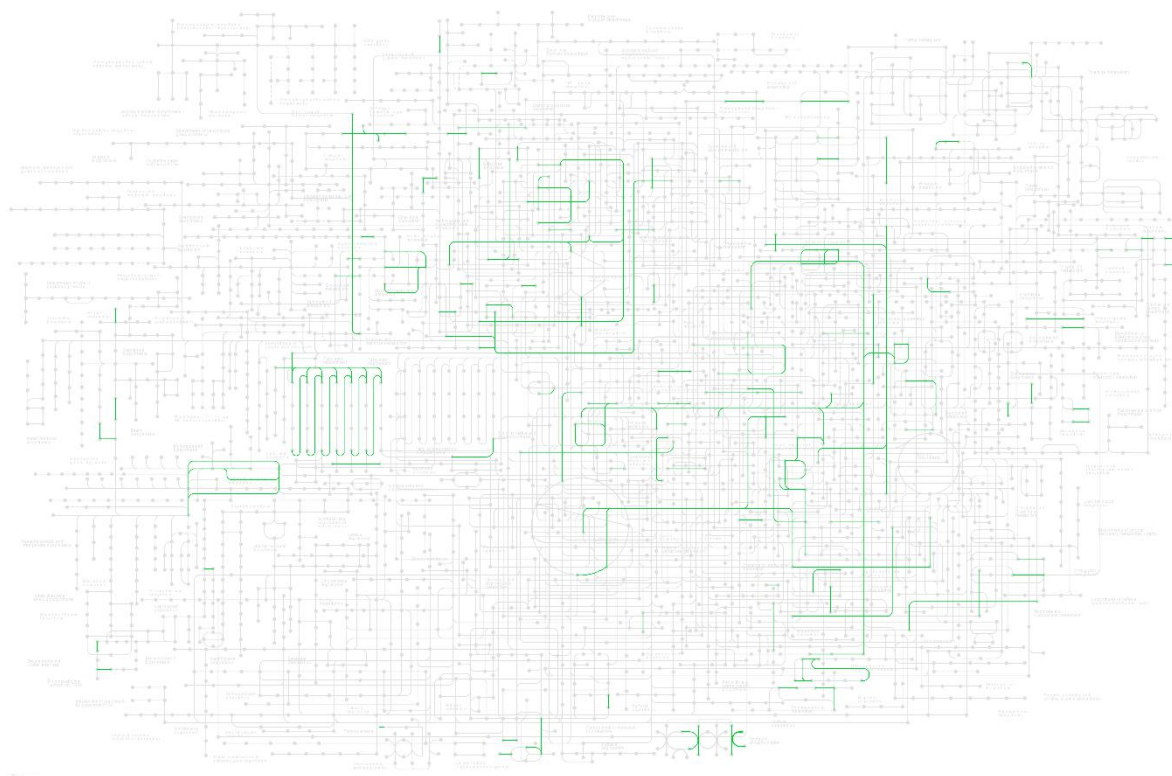

**Figure S4.** Metabolic pathways affected in severely CTV-infected plants. Green lines indicate differentially regulated pathways.

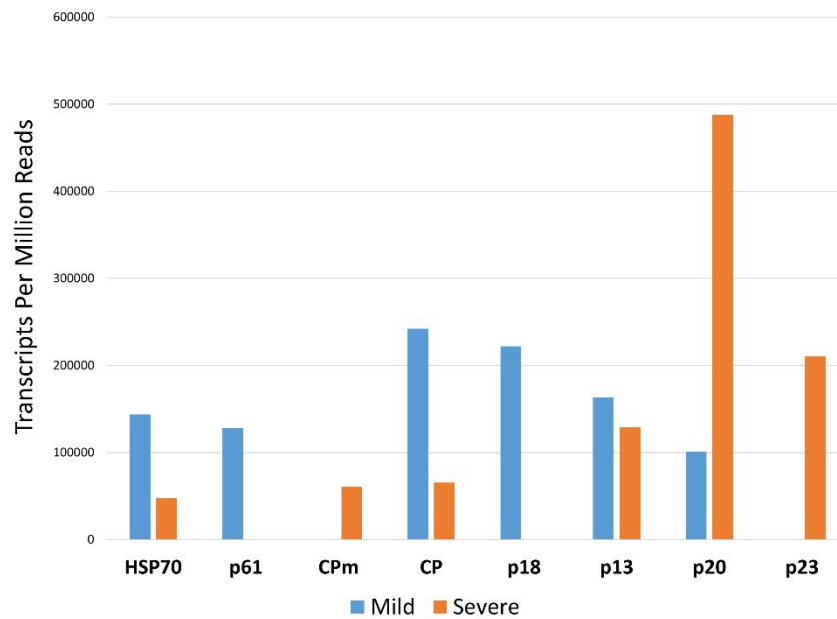

**Figure S5.** Comparison of viral ORF transcripts per million reads obtained in plants infected with either mild (blue) or severe (orange) CTV strains. Gene description: HSP70H, Hsp70-homolog; p61, 61-kDa protein; CPm, minor capsid protein; CP, major capsid protein; p18, 18-kDa protein; p13, 13-kDa protein; p20, 20-kDa protein/RNA silencing suppressor; p23, RNA silencing suppressor.
